# Supplementary material for: Virtual screening of the potential hCA XII inhibitors based on the pharmacophore modelling, molecular docking, MMGBSA and molecular dynamics simulations studies
Source: Research Square preprint supplement (doi:10.21203/rs.3.rs-394808/v1), 2021-04-08
Supplement: Supplementary file 2 [file e14570a784e69ac64e44144e.xls]

## Sheet: Лист2
Structure-based approach		Ligand-based approach
ZINC ID	Energy(kJ/mol)	ZINC ID	Energy(kJ/mol)
ZINC70704873	-105.68	ZINC49181869	-139.62
ZINC04221765	-93.03	ZINC49181861	-133.3
ZINC02131655	-85.34	ZINC49181866	-120.74
ZINC70699917	-77.17	ZINC08829478	-111.7
ZINC15958674	-76.88	ZINC08792367	-109.86
Table 2. Binding energies of the top “natural and derivatives” compounds after re-scoring using MM-GBSA.
